# Supplementary material
Source: HighWire-hosted journal article supplement (https://erj.ersjournals.com/content/53/5/1802472)
Supplement: inline-supplementary-material-1 [file inline-supplementary-material-1.pdf]

# **Pulmonary Arterial Hypertension associated with Protein Kinase Inhibitors: A pharmacovigilance-pharmacodynamic study**

## **SUPPLEMENTARY MATERIAL**

### **Table of content**

|                                                                                                                                                                                                  |          |
|--------------------------------------------------------------------------------------------------------------------------------------------------------------------------------------------------|----------|
| <i>Appendix 1. Details of co-reported MedDRA term excluded from the analysis.....</i>                                                                                                            | <i>2</i> |
| <i>Figure S1. Flow chart of PAH cases selection for analysis.....</i>                                                                                                                            | <i>2</i> |
| <i>Figure S2. Flow chart of the literature review aiming to identify protein kinases involved in pulmonary function. ....</i>                                                                    | <i>3</i> |
| <i>Appendix 2. Selected protein kinases and most relevant references. ....</i>                                                                                                                   | <i>4</i> |
| <i>Appendix 3. Results of ROR sensitivity analysis, standardizing on time on the market.....</i>                                                                                                 | <i>6</i> |
| <i>Figure S3. Disproportionality signal of PAH induced by PKI six years after FDA approval versus all medication in pharmacovigilance database. ROR and 95% CI were log transformed.....</i>     | <i>6</i> |
| <i>Appendix 4. Results of correlations sensitivity analysis standardizing on time on the market, including only PKI with more the 3 PAH cases and using affinity data from Davis et al. ....</i> | <i>7</i> |

## Appendix 1. Details of co-reported MedDRA term excluded from the analysis

**-cardiac disorders** (from MedDRA classification: Cardiac disorders SOC - Cardiac and vascular disorder congenital HGLT - Cardiac and vascular investigation HGLT).

**- pulmonary disorders** (respiratory and mediastinal neoplasms malignant and unspecified HGLT - bronchial disorders (excl neoplasms) HGLT - lower respiratory tract inflammatory and immunologic conditions HLT– parenchymal lung disorders HLT - pulmonary thrombotic and embolic conditions HLT - respiratory tract disorders NEC HLT – tumour embolism / tumour thrombosis PT) and

**-thrombotic disorders** (embolism and thrombosis HGLT).

Figure S1. Flow chart of PAH cases selection for analysis

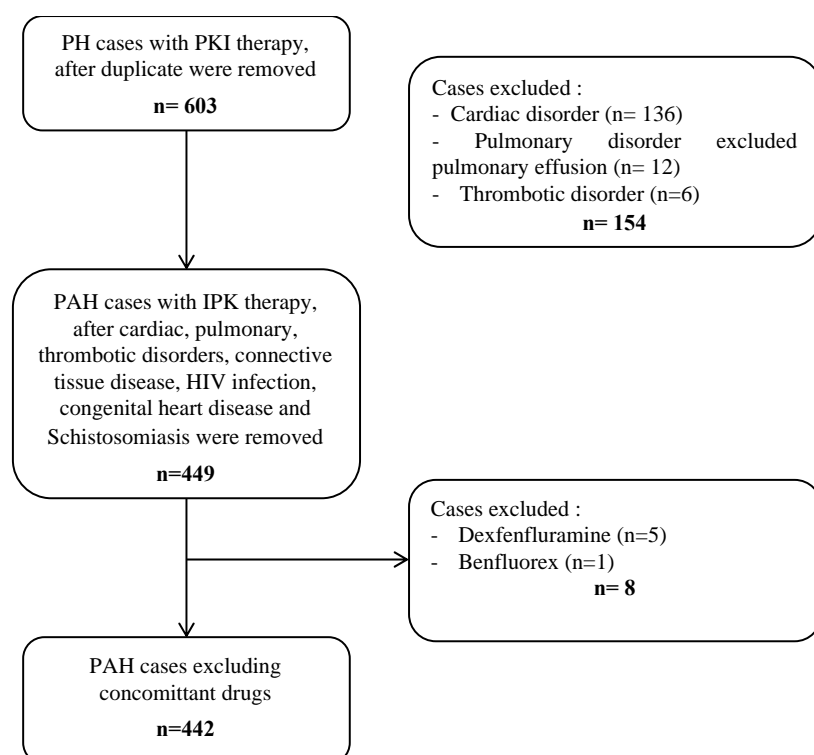

Figure S2. Flow chart of the literature review aiming to identify protein kinases involved in pulmonary function.

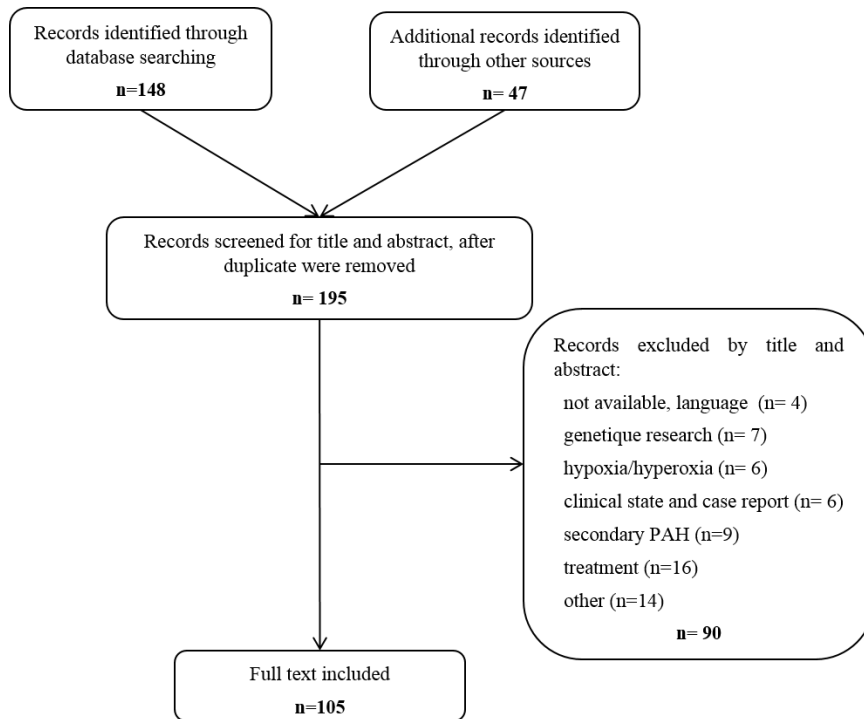

Appendix 2. Selected protein kinases and most relevant references.

| <b>Target involved in pulmonary pathophysiology</b>                                          | <b>Sources</b>                                                             |
|----------------------------------------------------------------------------------------------|----------------------------------------------------------------------------|
| <b>ALK1 Activin receptor-like kinase-1</b>                                                   | (Star et al., 2010) ; (Girerd et al., 2017) ;<br>(Gore et al., 2014)       |
| <b>ALK5 transforming growth factor-<math>\beta</math>1 (TGF<math>\beta</math>1)</b>          | (Tojais et al., 2017)<br>(Upton and Morrell, 2013)                         |
| <b>AMPKa1 (AMP-activated protein kinase)</b>                                                 | (Ibe et al., 2013)<br>(Omura et al., 2016)                                 |
| <b>AMPKa2</b>                                                                                | (Ibe et al., 2013)                                                         |
| <b>BMPR-1 = ALK6</b>                                                                         | (Chida et al., 2012)                                                       |
| <b>BMPR-2</b>                                                                                | (Tojais et al., 2017)                                                      |
| <b>B-Raf (Rapidly Accelerated Fibrosarcoma)</b>                                              | (Awad et al., 2016)                                                        |
| <b>C-Raf = Raf1</b>                                                                          | (Hopper et al., 2015)                                                      |
| <b>DDR1</b><br><b>Discoidin domain receptor</b>                                              | (Sakamoto et al., 2001)                                                    |
| <b>EIF2AK4</b><br><b>eukaryotic translation initiation factor 2</b><br><b>alpha kinase 4</b> | (Tenorio et al., 2015)<br>(Eichstaedt et al., 2016)<br>(Best et al., 2017) |
| <b>ERB-b1 = EGFR = Her1</b>                                                                  | (Dahal et al., 2010)                                                       |
| <b>ERB-b2 = HER2</b>                                                                         | (Dahal et al., 2010)                                                       |
| <b>focal adhesion kinase FAK</b>                                                             | (Paulin et al., 2014)                                                      |
| <b>FGFR1</b>                                                                                 | (Zheng et al., 2015)<br>(Kim, 2014)<br>(Izikki et al., 2009)               |
| <b>FGFR2</b>                                                                                 | (Schermuly et al., 2011)                                                   |
| <b>IGF-1R (insulin like growth factor)</b>                                                   | (Sun et al., 2016)<br>(Baumgart et al., 2017)<br>(Dewachter et al., 2014)  |
| <b>JAK 1</b>                                                                                 | (Lachmann et al., 2017)                                                    |

|                                                                              |                                                 |
|------------------------------------------------------------------------------|-------------------------------------------------|
| <b>JAK2</b>                                                                  | (Mattar et al., 2016)                           |
| <b>JNK1/2 (c-Jun N-terminal kinase) = mitogen-activated protein kinase 9</b> | (Wilson et al., 2015)<br>(Das et al., 2016)     |
| <b>c-kit = KIT</b><br><b>stem cell growth factor receptor (SCFR)</b>         | (Montani et al., 2014)<br>(Farha et al., 2014)  |
| <b>Lck Leukocyte C-terminal Src kinase</b>                                   | (Andruska et al., 2017)                         |
| <b>lyn</b>                                                                   | (Pullamsetti et al., 2012a)                     |
| <b>c MET = HGF</b>                                                           | (Schermuly et al., 2011)                        |
| <b>PDGFR<math>\alpha</math></b>                                              | (Berghausen et al., 2013)<br>(Schermuly, 2005)  |
| <b>PDGFR<math>\beta</math></b>                                               | (Cai et al., 2017)<br>(Weatherald et al., 2017) |
| <b>PKG cGMP-dependent protein kinase</b>                                     | (Patel et al., 2014)                            |
| <b>ROCK-2</b>                                                                | (Shimizu et al., 2013)                          |
| <b>Tyrosine-protein kinase c-Src</b>                                         | (Guignabert et al., 2016)                       |
| <b>TEC</b>                                                                   | (de Lavallade et al., 2008)                     |
| <b>TEK receptor tyrosine kinase TIE2</b>                                     | (Guignabert et al., 2016)                       |
| <b>VEGFR-1</b>                                                               | (Derrett-Smith et al., 2013)                    |
| <b>VEGFR-2</b>                                                               | (Nicolls et al., 2012)                          |
| <b>VEGFR-3</b>                                                               | (Hwangbo et al., 2017)                          |
| <b>c-yes</b>                                                                 | (Pullamsetti et al., 2012b)                     |

### Appendix 3. Results of ROR sensitivity analysis, standardizing on time on the market.

Sensitivity analysis were performed to compare the proportion of PAH reported for each PKI with the proportion of PAH reported for all other PKI.

We performed an analysis using only reported cases from the first six years after the FDA approval. A positive disproportionality signal was found for dasatinib with a ROR of 13.32 (8.56; 20.72), bosutinib 10.30 (6.63; 16.00), ponatinib 2.83 (1.41; 5.66), ruxolitinib 1.94 (1.20; 3.12) and nilotinib 2.07 (0.78; 5.53). Logarithmic value are represented in Figure S3.

Figure S3. Disproportionality signal of PAH induced by PKI six years after FDA approval versus all medication in pharmacovigilance database. ROR and 95% CI were log transformed.

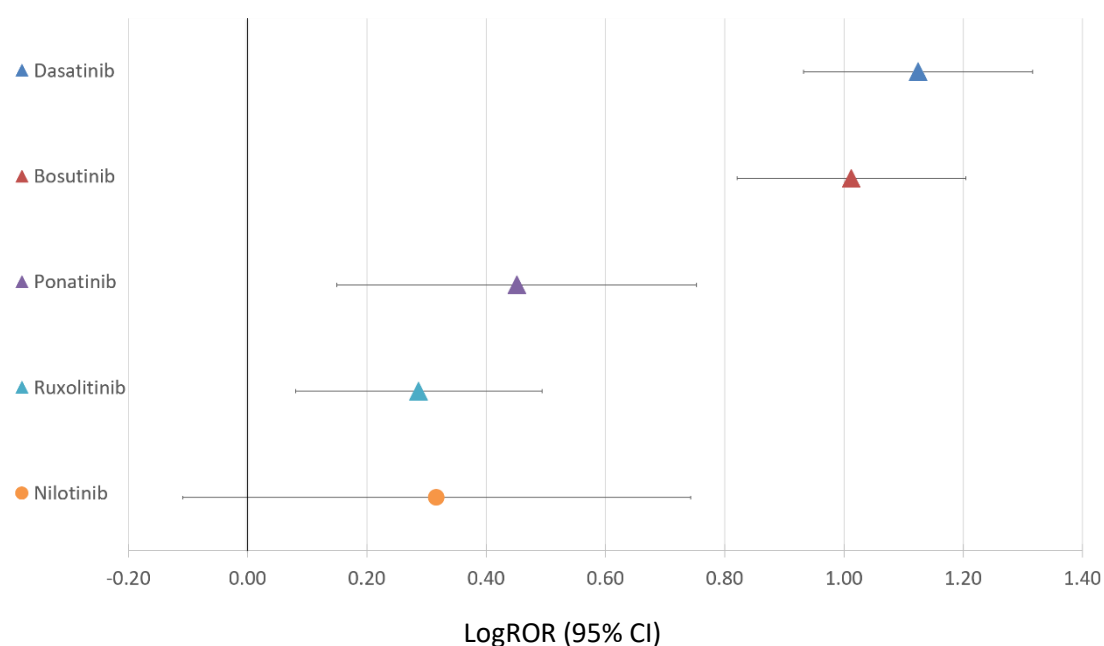

Appendix 4. Results of correlations sensitivity analysis standardizing on time on the market, including only PKI with more the 3 PAH cases and using affinity data from Davis et al.

| Target    | 6 year after approval |                 | More than 3 cases |                 | Affinity data from Davis et al. |                 |
|-----------|-----------------------|-----------------|-------------------|-----------------|---------------------------------|-----------------|
|           | r                     | p-value         | r                 | p-value         | r                               | p-value         |
| ALK1      | 0.47                  | 0.079           | <b>0.9</b>        | <b>0.0058</b>   | 0.54                            | 0.036           |
| ALK5      | 0.42                  | 0.12            | <b>0.98</b>       | <b>0.000069</b> | 0.4                             | 0.14            |
| AMPKa1    | -0.17                 | 0.55            | -0.26             | 0.57            | -0.18                           | 0.53            |
| AMPKa2    | -0.2                  | 0.47            | -0.3              | 0.52            | -0.18                           | 0.51            |
| B_Raf     | 0.37                  | 0.17            | 0.68              | 0.093           | 0.43                            | 0.11            |
| BMPR_1    | 0.3                   | 0.28            | 0.85              | 0.015           | 0.56                            | 0.031           |
| BMPR_2    | 0.2                   | 0.47            | -0.12             | 0.8             | 0.095                           | 0.74            |
| c_yes     | <b>0.84</b>           | <b>0.000079</b> | <b>0.87</b>       | <b>0.0011</b>   | <b>0.82</b>                     | <b>0.00018</b>  |
| c-src     | <b>0.89</b>           | <b>0.000007</b> | <b>0.9</b>        | <b>0.0054</b>   | <b>0.86</b>                     | <b>0.000042</b> |
| DDR1      | 0.48                  | 0.068           | 0.66              | 0.11            | 0.47                            | 0.075           |
| EIF2K4    | 0.2                   | 0.47            | 0.31              | 0.5             | 0.16                            | 0.56            |
| ERB_b1    | 0.053                 | 0.85            | 0.044             | 0.93            | 0.052                           | 0.85            |
| FAK       | 0.084                 | 0.76            | -0.046            | 0.92            | -0.0045                         | 0.99            |
| FGFR1     | -0.2                  | 0.48            | 0.0069            | 0.99            | -0.17                           | 0.54            |
| FGFR2     | -0.091                | 0.75            | 0.29              | 0.53            | -0.044                          | 0.88            |
| HER2      | -0.012                | 0.97            | 0.012             | 0.98            | 0.027                           | 0.92            |
| HGF       | -0.2                  | 0.47            | -0.0081           | 0.99            | -0.2                            | 0.48            |
| IGF_1R    | -0.22                 | 0.44            | -0.3              | 0.52            | -0.19                           | 0.49            |
| JAK1      | -0.21                 | 0.46            | -0.31             | 0.49            | -0.17                           | 0.55            |
| JAK2      | 0.014                 | 0.96            | -0.041            | 0.93            | 0.046                           | 0.87            |
| JNK1      | -0.2                  | 0.48            | -0.2              | 0.67            | -0.17                           | 0.55            |
| JNK2      | -0.31                 | 0.26            | -0.41             | 0.37            | -0.32                           | 0.25            |
| KIT       | 0.3                   | 0.28            | 0.44              | 0.32            | 0.33                            | 0.23            |
| Lck       | <b>0.84</b>           | <b>0.00016</b>  | 0.86              | 0.028           | <b>0.78</b>                     | <b>0.00057</b>  |
| Lyn       | <b>0.83</b>           | <b>0.00012</b>  | 0.83              | 0.02            | <b>0.8</b>                      | <b>0.00036</b>  |
| PDGFRalfa | 0.22                  | 0.44            | 0.44              | 0.32            | 0.29                            | 0.29            |
| PDGFRbeta | 0.25                  | 0.38            | 0.39              | 0.39            | 0.27                            | 0.32            |
| PKG       | -0.14                 | 0.63            | -0.15             | 0.75            | NA                              | NA              |
| RAF1      | 0.33                  | 0.22            | 0.85              | 0.016           | 0.37                            | 0.18            |
| ROCK_2    | 0.038                 | 0.89            | -0.19             | 0.68            | -0.02                           | 0.94            |
| TEC       | <b>0.77</b>           | <b>0.00082</b>  | <b>0.96</b>       | <b>0.00069</b>  | <b>0.88</b>                     | <b>0.000015</b> |
| TIE2      | -0.22                 | 0.43            | -0.056            | 0.91            | -0.25                           | 0.36            |

|         |       |      |       |      |       |      |
|---------|-------|------|-------|------|-------|------|
| VEGFR_1 | -0.32 | 0.24 | -0.26 | 0.58 | -0.32 | 0.24 |
| VEGFR_2 | -0.29 | 0.29 | -0.26 | 0.58 | -0.29 | 0.29 |
| VEGFR_3 | -0.37 | 0.18 | -0.39 | 0.39 | -0.37 | 0.18 |

## References

Andruska, A., Dannewitz, S., Sudheendra, D., Tian, X., Nagendran, M., Spiekerkoetter, E., Harbury, P., and Desai, T. (2017). Lymphocyte Specific Protein Tyrosine Kinase (LCK), a Novel BMPR2 Modulator, Validated by In Situ Transcriptome Profiling.

Awad, K.S., Elinoff, J.M., Wang, S., Gairhe, S., Ferreyra, G.A., Cai, R., Sun, J., Solomon, M.A., and Danner, R.L. (2016). Raf/ERK drives the proliferative and invasive phenotype of BMPR2-silenced pulmonary artery endothelial cells. *Am. J. Physiol. - Lung Cell. Mol. Physiol.* *310*, L187–L201.

Baumgart, B., Guha, M., Hennan, J., Li, J., Woicke, J., Simic, D., Graziano, M., Wallis, N., Sanderson, T., and Bunch, R.T. (2017). In vitro and in vivo evaluation of dasatinib and imatinib on physiological parameters of pulmonary arterial hypertension. *Cancer Chemother. Pharmacol.* *79*, 711–723.

Berghausen, E., ten Freyhaus, H., and Rosenkranz, S. (2013). Targeting of Platelet-Derived Growth Factor Signaling in Pulmonary Arterial Hypertension. In *Pharmacotherapy of Pulmonary Hypertension*, M. Humbert, O.V. Evgenov, and J.-P. Stasch, eds. (Berlin, Heidelberg: Springer Berlin Heidelberg), pp. 381–408.

Best, D.H., Sumner, K.L., Smith, B.P., Damjanovich-Colmenares, K., Nakayama, I., Brown, L.M., Ha, Y., Paul, E., Morris, A., Jama, M.A., et al. (2017). EIF2AK4 Mutations in Patients Diagnosed With Pulmonary Arterial Hypertension. *Chest* *151*, 821–828.

Cai, P., Kovacs, L., Dong, S., Wu, G., and Su, Y. (2017). BMP4 inhibits PDGF-induced proliferation and collagen synthesis via PKA-mediated inhibition of calpain-2 in pulmonary artery smooth muscle cells. *Am. J. Physiol. - Lung Cell. Mol. Physiol.* *312*, L638–L648.

Chida, A., Shintani, M., Nakayama, T., Furutani, Y., Hayama, E., Inai, K., Saji, T., Nonoyama, S., and Nakanishi, T. (2012). Missense mutations of the BMPR1B (ALK6) gene in childhood idiopathic pulmonary arterial hypertension. *Circ. J. Off. J. Jpn. Circ. Soc.* *76*, 1501–1508.

Dahal, B.K., Cornitescu, T., Tretyn, A., Pullamsetti, S.S., Kosanovic, D., Dumitrascu, R., Ghofrani, H.A., Weissmann, N., Voswinckel, R., Banat, G.-A., et al. (2010). Role of Epidermal Growth Factor Inhibition in Experimental Pulmonary Hypertension. *Am. J. Respir. Crit. Care Med.* *181*, 158–167.



Das, M., Zawada, M., West, J., and Stenmark, K. (2016). JNK2 Regulates Vascular Remodeling in Pulmonary Hypertension.

Derrett-Smith, E.C., Dooley, A., Gilbane, A.J., Trinder, S.L., Khan, K., Baliga, R., Holmes, A.M., Hobbs, A.J., Abraham, D., and Denton, C.P. (2013). Endothelial Injury in a Transforming Growth Factor  $\beta$ -Dependent Mouse Model of Scleroderma Induces Pulmonary Arterial Hypertension: PAH in a Mouse Model of Scleroderma. *Arthritis Rheum.* 65, 2928–2939.

Dewachter, L., Dewachter, C., Belhaj, A., Lalande, S., Rondelet, B., Remmelink, M., Vachiéry, J.-L., and Naeije, R. (2014). Insulin-like growth factor-1 contributes to the pulmonary artery smooth muscle cell proliferation in pulmonary arterial hypertension. *Eur. Respir. J.* 44, 316.

Eichstaedt, C.A., Song, J., Benjamin, N., Harutyunova, S., Fischer, C., Grünig, E., and Hinderhofer, K. (2016). EIF2AK4 mutation as “second hit” in hereditary pulmonary arterial hypertension. *Respir. Res.* 17.

Farha, S., Dweik, R., Rahaghi, F., Benza, R., Hassoun, P., Frantz, R., Torres, F., Quinn, D.A., Comhair, S., Erzurum, S., et al. (2014). Imatinib in Pulmonary Arterial Hypertension: C-Kit Inhibition. *Pulm. Circ.* 4, 452–455.

Girerd, B., Weatherald, J., Montani, D., and Humbert, M. (2017). Heritable pulmonary hypertension: from bench to bedside. *Eur. Respir. Rev.* 26, 170037.

Gore, B., Izikki, M., Mercier, O., Dewachter, L., Fadel, E., Humbert, M., Darteville, P., Simonneau, G., Naeije, R., Lebrin, F., et al. (2014). Key Role of the Endothelial TGF- $\beta$ /ALK1/Endoglin Signaling Pathway in Humans and Rodents Pulmonary Hypertension. *PLoS ONE* 9, e100310.

Guignabert, C., Phan, C., Seferian, A., Huertas, A., Tu, L., Thuillet, R., Sattler, C., Le Hiress, M., Tamura, Y., Jutant, E.-M., et al. (2016). Dasatinib induces lung vascular toxicity and predisposes to pulmonary hypertension. *J. Clin. Invest.* 126, 3207–3218.

Hopper, R.K., Feinstein, J.A., Manning, M.A., Benitz, W., and Hudgins, L. (2015). Neonatal pulmonary arterial hypertension and Noonan syndrome: Two fatal cases with a specific *RAF1* mutation. *Am. J. Med. Genet. A.* 167, 882–885.

Hwangbo, C., Lee, H.-W., Kang, H., Ju, H., Wiley, D.S., Papangelis, I., Han, J., Kim, J.-D., Dunworth, W.P., Hu, X., et al. (2017). Modulation of Endothelial Bone Morphogenetic Protein Receptor Type 2 Activity by Vascular Endothelial Growth Factor Receptor 3 in Pulmonary Arterial HypertensionClinical Perspective. *Circulation* 135, 2288–2298.

Ibe, J.C.F., Zhou, Q., Chen, T., Tang, H., Yuan, J.X.-J., Raj, J.U., and Zhou, G. (2013). Adenosine Monophosphate-Activated Protein Kinase Is Required for Pulmonary Artery Smooth Muscle Cell Survival and the Development of Hypoxic Pulmonary Hypertension. *Am. J. Respir. Cell Mol. Biol.*

49, 609–618.

Izikki, M., Guignabert, C., Fadel, E., Humbert, M., Tu, L., Zadigue, P., Darteville, P., Simonneau, G., Adnot, S., Maitre, B., et al. (2009). Endothelial-derived FGF2 contributes to the progression of pulmonary hypertension in humans and rodents. *J. Clin. Invest.* 119, 512–523.

Kim, J. (2014). Apelin-APJ Signaling: a Potential Therapeutic Target for Pulmonary Arterial Hypertension. *Mol. Cells* 37, 196–201.

Lachmann, M.J., Yuasa, S., and Fukuda, K. (2017). 5024JAK1/2 inhibitor ruxolitinib restores the responsiveness to hypoxia in pulmonary arterial hypertension-iPSC-derived endothelial cells. *Eur. Heart J.* 38.

de Lavallade, H., Punialingam, S., Milojkovic, D., Bua, M., Khorashad, J.S., Gabriel, I.H., Chaidos, A., Olavarria, E., Goldman, J.M., Apperley, J.F., et al. (2008). Pleural effusions in patients with chronic myeloid leukaemia treated with dasatinib may have an immune-mediated pathogenesis. *Br. J. Haematol.* 141, 745–747.

Mattar, M.M., Morad, M.A.K., El Hussein, N.M., Ali, N.H., and El Demerdash, D.M. (2016). Correlation between JAK2 allele burden and pulmonary arterial hypertension and hematological parameters in Philadelphia negative JAK2 positive myeloproliferative neoplasms. An Egyptian experience. *Ann. Hematol.* 95, 1611–1616.

Montani, D., Chaumais, M.-C., Guignabert, C., Günther, S., Girerd, B., Jaïs, X., Algalarrondo, V., Price, L.C., Savale, L., Sitbon, O., et al. (2014). Targeted therapies in pulmonary arterial hypertension. *Pharmacol. Ther.* 141, 172–191.

Nicolls, M.R., Mizuno, S., Taraseviciene-Stewart, L., Farkas, L., Drake, J.I., Hussein, A.A., Gomez-Arroyo, J.G., Voelkel, N.F., and Bogaard, H.J. (2012). New Models of Pulmonary Hypertension Based on VEGF Receptor Blockade-Induced Endothelial Cell Apoptosis. *Pulm. Circ.* 2, 434–442.

Omura, J., Satoh, K., Kikuchi, N., Satoh, T., Kurosawa, R., Nogi, M., Otsuki, T., Kozu, K., Numano, K., Suzuki, K., et al. (2016). Protective Roles of Endothelial AMP-Activated Protein Kinase Against Hypoxia-Induced Pulmonary Hypertension in Mice Novelty and Significance. *Circ. Res.* 119, 197–209.

Patel, D., Alhawaj, R., and Wolin, M.S. (2014). Exposure of mice to chronic hypoxia attenuates pulmonary arterial contractile responses to acute hypoxia by increases in extracellular hydrogen peroxide. *Am. J. Physiol.-Regul. Integr. Comp. Physiol.* 307, R426–R433.

Paulin, R., Meloche, J., Courboulain, A., Lambert, C., Haromy, A., Courchesne, A., Bonnet, P., Provencher, S., Michelakis, E.D., and Bonnet, S. (2014). Targeting cell motility in pulmonary arterial hypertension. *Eur. Respir. J.* 43, 531–544.

Pullamsetti, S.S., Berghausen, E.M., Dabral, S., Tretyn, A., Butrous, E., Savai, R., Butrous, G., Dahal, B.K., Brandes, R.P., Ghofrani, H.A., et al. (2012a). Role of Src Tyrosine Kinases in Experimental Pulmonary Hypertension. *Arterioscler. Thromb. Vasc. Biol.* 32, 1354–1365.

Pullamsetti, S.S., Berghausen, E.M., Dabral, S., Tretyn, A., Butrous, E., Savai, R., Butrous, G., Dahal, B.K., Brandes, R.P., Ghofrani, H.A., et al. (2012b). Role of Src Tyrosine Kinases in Experimental Pulmonary Hypertension. *Arterioscler. Thromb. Vasc. Biol.* 32, 1354–1365.

Sakamoto, O., Suga, M., Suda, T., and Ando, M. (2001). Expression of discoidin domain receptor 1 tyrosine kinase on the human bronchial epithelium. *Eur. Respir. J.* 17, 969–974.

Schermuly, R.T. (2005). Reversal of experimental pulmonary hypertension by PDGF inhibition. *J. Clin. Invest.* 115, 2811–2821.

Schermuly, R.T., Ghofrani, H.A., Wilkins, M.R., and Grimminger, F. (2011). Mechanisms of disease: pulmonary arterial hypertension. *Nat. Rev. Cardiol.* 8, 443–455.

Shimizu, T., Fukumoto, Y., Tanaka, S. -i., Satoh, K., Ikeda, S., and Shimokawa, H. (2013). Crucial Role of ROCK2 in Vascular Smooth Muscle Cells for Hypoxia-Induced Pulmonary Hypertension in Mice. *Arterioscler. Thromb. Vasc. Biol.* 33, 2780–2791.

Star, G.P., Giovinazzo, M., and Langleben, D. (2010). Bone morphogenic protein-9 stimulates endothelin-1 release from human pulmonary microvascular endothelial cellsA potential mechanism for elevated ET-1 levels in pulmonary arterial hypertension. *Microvasc. Res.* 80, 349–354.

Sun, M., Ramchandran, R., Chen, J., Yang, Q., and Raj, J.U. (2016). Smooth Muscle Insulin-Like Growth Factor-1 Mediates Hypoxia-Induced Pulmonary Hypertension in Neonatal Mice. *Am. J. Respir. Cell Mol. Biol.* 55, 779–791.

Tenorio, J., Navas, P., Barrios, E., Fernández, L., Nevado, J., Quezada, C.A., López-Meseguer, M., Arias, P., Mena, R., Lobo, J.L., et al. (2015). A founder *EIF2AK4* mutation causes an aggressive form of pulmonary arterial hypertension in Iberian Gypsies: *EIF2AK4* mutation causing pulmonary arterial hypertension in Iberian Gypsies. *Clin. Genet.* 88, 579–583.

Tojais, N.F., Cao, A., Lai, Y.-J., Wang, L., Chen, P.-I., Alcazar, M.A.A., de Jesus Perez, V.A., Hopper, R.K., Rhodes, C.J., Bill, M.A., et al. (2017). Codependence of Bone Morphogenetic Protein Receptor 2 and Transforming Growth Factor- $\beta$  in Elastic Fiber Assembly and Its Perturbation in Pulmonary Arterial HypertensionHighlights. *Arterioscler. Thromb. Vasc. Biol.* 37, 1559–1569.

Upton, P.D., and Morrell, N.W. (2013). The transforming growth factor- $\beta$ -bone morphogenetic protein type signalling pathway in pulmonary vascular homeostasis and disease: Signalling pathways in pulmonary vasculature. *Exp. Physiol.* 98, 1262–1266.

Weatherald, J., Chaumais, M.-C., and Montani, D. (2017). Pulmonary arterial hypertension induced by tyrosine kinase inhibitors: *Curr. Opin. Pulm. Med.* 1.

Wilson, J.L., Yu, J., Taylor, L., and Polgar, P. (2015). Hyperplastic Growth of Pulmonary Artery Smooth Muscle Cells from Subjects with Pulmonary Arterial Hypertension Is Activated through JNK and p38 MAPK. *PLOS ONE* 10, e0123662.

Zheng, Y., Ma, H., Hu, E., Huang, Z., Cheng, X., and Xiong, C. (2015). Inhibition of FGFR Signaling With PD173074 Ameliorates Monocrotaline-induced Pulmonary Arterial Hypertension and Rescues BMPR-II Expression: *J. Cardiovasc. Pharmacol.* 66, 504–514.
